# Supplementary material
Source: PubMed Central journal article supplement (PMC5976528)

## SUPPLEMENTAL MATERIAL

**Supplemental Table 1.** Samples for Each End Point

|                  | Control | PAH  |         |       |
|------------------|---------|------|---------|-------|
|                  |         | IPAH | SSc-PAH | SSc-d |
| Total            | 7       | 7    | 11      | 6     |
| Cardiac MRI      | -       | 5    | 11      | 6     |
| PV Loop          | -       | 5    | 11      | 6     |
| Exercise PV Loop | -       | 4    | 10      | 4     |
| Histology        | 0       | 4    | 11      | 3     |
| Myofilament      | 7       | 7    | 7       | 6     |

A total of 7 control, 7 IPAH, 11 SSc-PAH, and 6 SSc-d subjects were recruited for RV septal tissue procurement. A subset of these subjects underwent invasive right ventricular pressure-volume (PV) assessments at rest  $\pm$  exercise. Serum was obtained on all those who underwent RHC. Myocardial tissue went towards different assays (histology, myofilament function) depending on tissue availability.

**Supplemental Table 2. Demographic and Clinical Data**

|                             | Control   | IPAH        | SSc-PAH   | P-value * | SSc-d     | P-value † |
|-----------------------------|-----------|-------------|-----------|-----------|-----------|-----------|
|                             | N=7       | N=7         | N=11      |           | N=6       |           |
| <b>Demographics</b>         |           |             |           |           |           |           |
| Age (years)                 | 47 ± 16   | 56 ± 13     | 58 ± 13   | 0.35      | 59 ± 8    | 0.92      |
| Female (n, %)               | 3 (42%)   | 5 (71%)     | 10 (91%)  | 0.09      | 5 (83%)   | 1.00      |
| Caucasian (n, %)            | 5 (83%)   | 5 (71%)     | 9 (82%)   | 0.65      | 4 (66%)   | 0.69      |
| BSA (m <sup>2</sup> )       | 1.8 ± 0.3 | 2.1 ± 0.2 # | 1.8 ± 0.2 | 0.01      | 1.7 ± 0.2 | 0.84      |
| <b>Clinical</b>             |           |             |           |           |           |           |
| WHO FC I (n, %)             |           | 0           | 1         | 0.78      | 0         | 1.00      |
| WHO FC II (n, %)            |           | 4           | 4         | 0.78      | 3         | 1.00      |
| WHO FC III (n, %)           |           | 3           | 6         | 0.78      | 3         | 1.00      |
| 6MWT (%)                    |           | 75 ± 30%    | 66 ± 14%  | 0.50      | 84 ± 18%  |           |
| ERA (n, %)                  |           | 2 (28%)     | 1 (9%)    | 0.53      | 0 (0%)    | 1.00      |
| PDE5I (n, %)                |           | 3 (42%)     | 5 (45%)   | 1.00      | 0 (0%)    | 0.10      |
| Pro-BNP (pg/ml)             |           | 650 ± 1056  | 683 ± 620 | 0.34      | 389 ± 606 | 0.13      |
| <b>Cardiac MRI</b>          |           |             |           |           |           |           |
| RVEDVi (ml/m <sup>2</sup> ) |           | 99 ± 28     | 89 ± 20   | 0.40      | 87 ± 22   | 0.55      |
| RVESVi (ml/m <sup>2</sup> ) |           | 51 ± 17     | 48 ± 21   | 0.69      | 46 ± 21   | 0.84      |
| RVEF (%)                    |           | 46 ± 7      | 49 ± 13   | 0.61      | 50 ± 13   | 0.69      |
| RV mass (g)                 |           | 14 ± 7      | 14 ± 5    | 0.69      | 14 ± 4    | 0.62      |

Demographic and clinical characteristics of non-failing donor control, IPAH, SSc-PAH, and SSc without resting PAH (SSc-d) subjects. Wilcoxon-rank-sum was used to compare means of two groups, while Kruskal-Wallis analysis of variance on ranks was used to compare three groups. Proportions were compared using Fisher's exact test. \* Overall P-value of comparison between control, IPAH, and SSc-PAH groups; † P-value comparing SSc-d versus SSc-PAH. # post-hoc P<0.05 versus other groups. BSA, body surface area; WHO, World Health Organization; FC, functional class; 6MWT, Six-minute walk test; ERA, Endothelin-receptor antagonist; PDE5I, Phosphodiesterase-5 inhibitor; Pro-BNP, Pro-brain natriuretic peptide; RVEDVi, RV end-diastolic volume index; RVESVi, RV end-systolic volume index; RVEF, RV ejection fraction.

**Supplemental Figure 1.** Representative affixed skinned myocyte

Example of a live digital image of a skinned myocyte at 40X magnification, affixed and suspended between a force transducer and length controller (Aurora Scientific, Ontario, Canada). Fourier transformation of the digital camera image provided the sarcomere length (SL) below, here measured at 1.831  $\mu\text{m}$ .

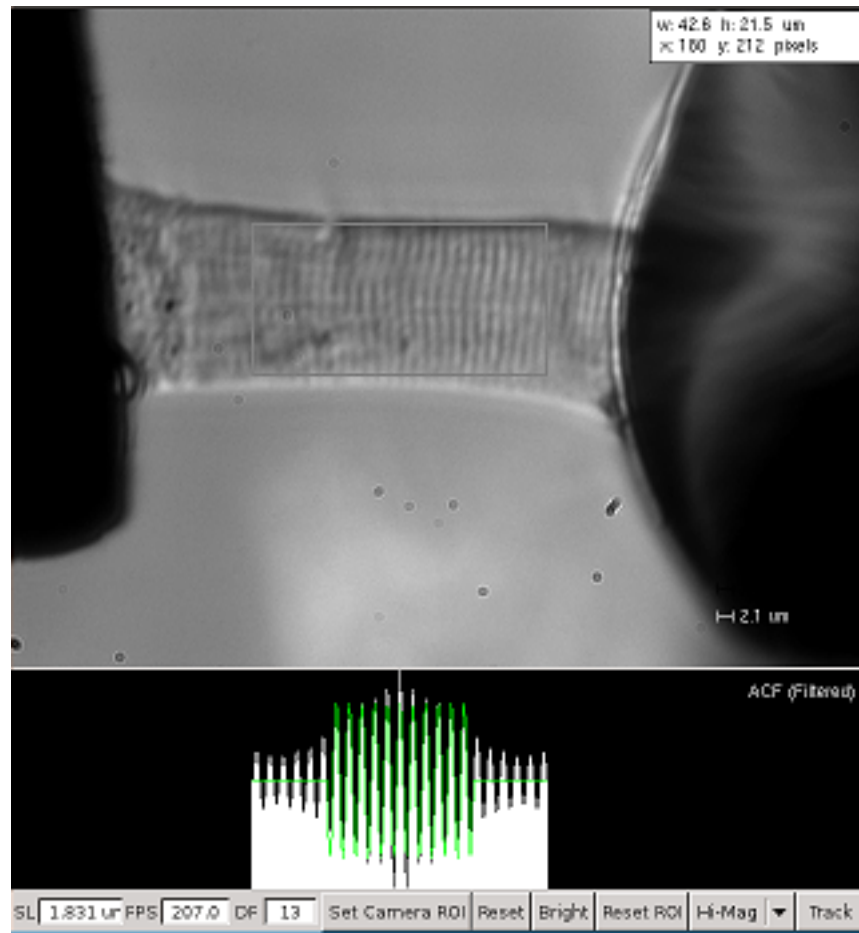

Supplement: NIHMS936307-supplement-Supplemental_Material_1.pdf [file NIHMS936307-supplement-Supplemental_Material_1.pdf]
